# Supplementary material for: Systemic Investigation Identifying Salivary miR-196b as a Promising Biomarker for Early Detection of Head-Neck Cancer and Oral Precancer Lesions
Source: MDPI journal article supplement (doi:10.3390/diagnostics11081411), 2021-08-04
Supplement: s1 [file s1]

# Systemic Investigation Identifying Salivary miR-196b as a Promising Biomarker for Early Detection of Head-Neck Cancer and Oral Precancer Lesions

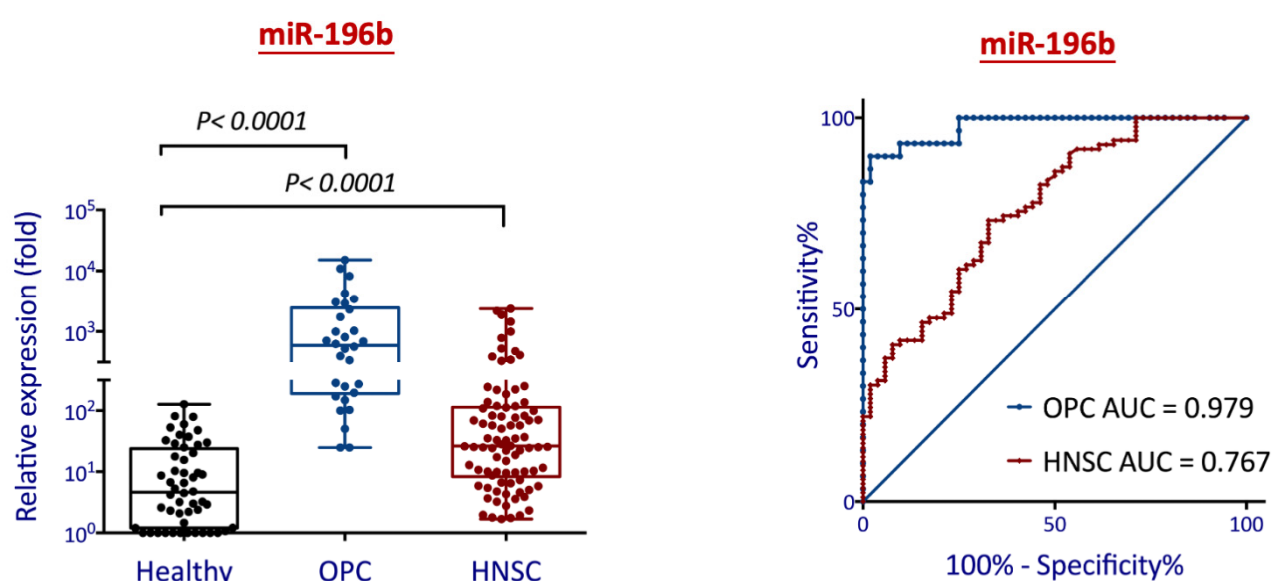

**Figure S1.** Elevation of miR-196b in the patients with HNSC and OPC. A total of 168 saliva samples from 52 normal individuals, 30 OPC patients, and 86 HNSC patients were recruited. Relative expression levels and the significance of miR-196b in differentiation between healthy individuals and HNSC or OPC patients. The relative expression level with (fold) was presented, after comparison to the level in OECM1 cancer cell lines (1:1000) by RT-qPCR analysis. The horizontal line across the center of the box plot represents the median value. Statistically significant differences were determined using the Mann–Whitney U test. The performance of receiver operating characteristic (ROC) curves and the area under the curve (AUC) of the ROC were shown.
